# Supplementary material for: Incredible PCE enhancement induced by damaged perovskite layers: deeply understanding the working principle of additives in bulk heterojunction perovskite solar cells
Source: Royal Society of Chemistry journal article supplement (doi:10.1039/c7ta09740a), 2018-01-01
Supplement: c7ta09740a1.pdf [file c7ta09740a1.pdf]

Supplementary Information

**Incredible PCE Enhancement Induced by Damaged Perovskite**

**Layers: Deeply Understanding the Working Principle of  
Additives in Bulk Heterojunction Perovskite Solar Cells**

**Liguo Gao<sup>1,\*</sup>, Likun Wang<sup>1</sup>, Xiaogang Ding<sup>1</sup>, Erling Zhao<sup>1</sup>, Shuzhang Yang<sup>1</sup>, Yingyuan  
Zhao<sup>1</sup>, Yanqiang Li<sup>1</sup>, Shufeng Wang<sup>2</sup>, Tingli Ma<sup>3,\*</sup>**

<sup>1</sup>State Key Laboratory of Fine Chemicals, School of petroleum and chemical engineering, Dalian University of Technology, Panjin, 124221, China.

<sup>2</sup>Department of Physics, Peking University, Beijing 100871, China.

<sup>3</sup>Graduate School of Life Science and Systems Engineering, Kyushu Institute of Technology, 2-4 Hibikino, Wakamatsu, Kitakyushu, Fukuoka 808-0196, Japan.

\* Corresponding author. Email: [liguo.gao@dlut.edu.cn](mailto:liguo.gao@dlut.edu.cn)

Tel: +86-427-2631810.

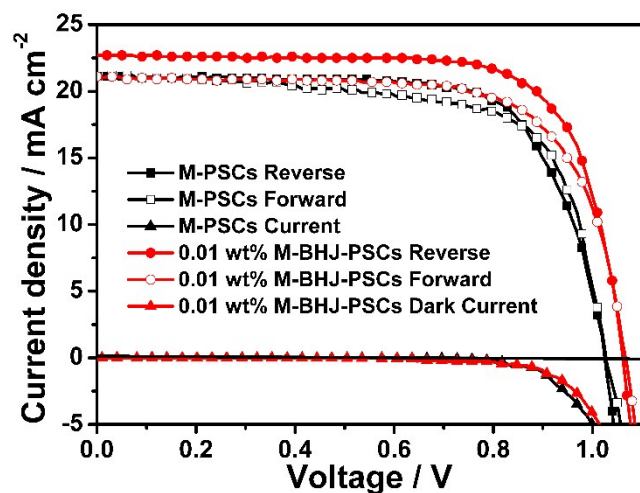

Fig. S1. J-V curves of the champion M-PSCs and M-BHJ-PSCs with 0.01 wt% Spiro-OMeTAD additive.

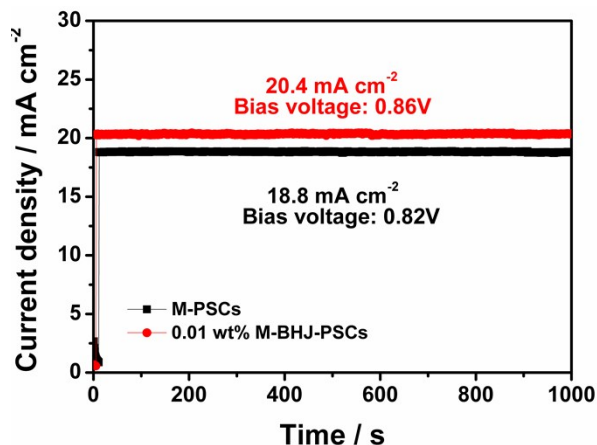

Fig. S2 Steady-state efficiencies measurements in M-PSCs and M-BHJ-PSCs.

The crystallization of perovskite layer was deterred by Spiro-OMeTAD additive, even an extremely low concentration (0.01 wt%), which could be observed from XRD results shown as Fig. S3 and Table 2. With more Spiro-OMeTAD additive, the full width of peaks at half maxima (FWHM) of the perovskite crystal in XRD increased. From equation of Debye-Scherrer:

$$D = \frac{K\lambda}{B\cos\theta}$$

Where D is size of perovskite crystal, K is constant of Scherrer, B is FWHM,  $\theta$  is angle of diffraction. Therefore, the Spiro-OMeTAD additive shows a negative role in the crystallization of perovskite film, because the size of perovskite layer decreased with FWHM increasing.

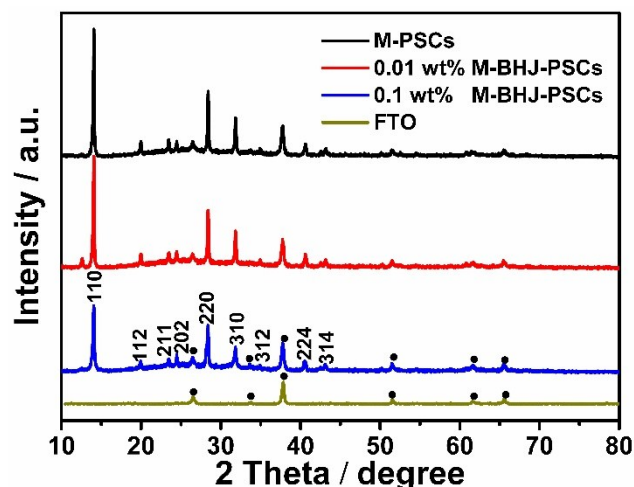

Fig. S3 XRD patterns of perovskite layer in M-PSCs and M-BHJ-PSCs with different Spiro-OMeTAD additive.

Table 2 XRD parameter full width of peaks at half maxima (FWHM) of perovskite layer in M-PSCs and M-BHJ-PSCs with different Spiro-OMeTAD additive.

| Spiro-OMeTAD<br>(wt%) | additive | FWHM( $2\theta=14.1^\circ$ ) | FWHM( $2\theta=28.4^\circ$ ) | FWHM( $2\theta=31.8^\circ$ ) |
|-----------------------|----------|------------------------------|------------------------------|------------------------------|
| 0                     |          | 0.178                        | 0.170                        | 0.186                        |

|      |       |       |       |
|------|-------|-------|-------|
| 0.01 | 0.183 | 0.194 | 0.177 |
| 0.1  | 0.237 | 0.251 | 0.280 |

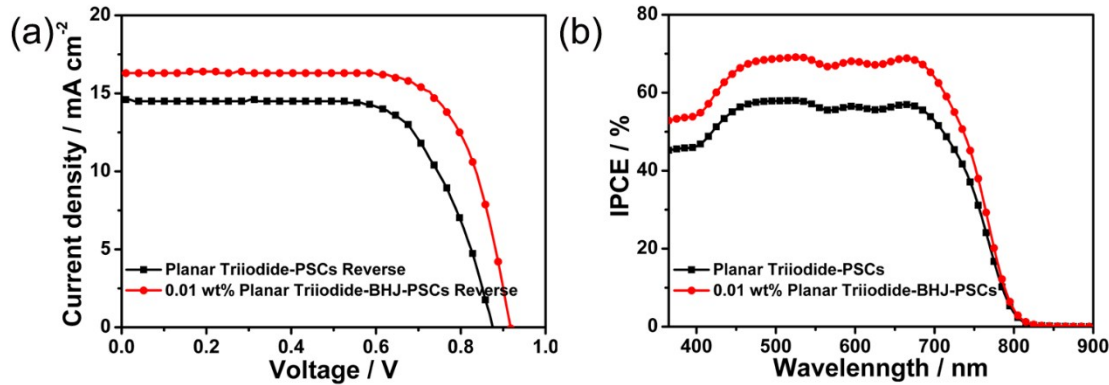

Fig. S4 (a) J-V curves of the champion planar PSCs (MAPbI<sub>3</sub>) and planar BHJ-PSCs (MAPbI<sub>3</sub>) with 0.01 wt% Spiro-OMeTAD additive measured under simulated AM 1.5G (100 mW cm<sup>-2</sup>) illumination and dark with a reverse voltage scanning mode; (b) IPCE curves of the champion planar PSCs (MAPbI<sub>3</sub>) and planar BHJ-PSCs (MAPbI<sub>3</sub>) with 0.01 wt% Spiro-OMeTAD additive.

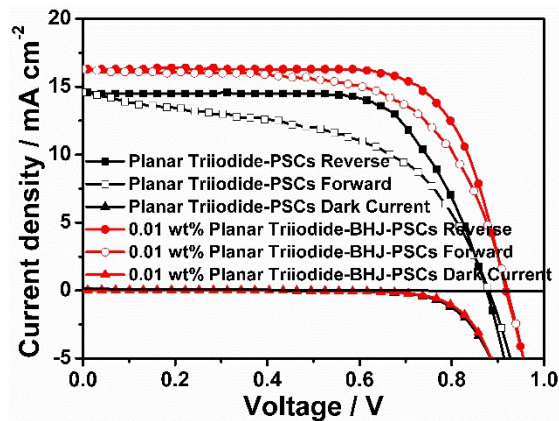

Fig. S5 J-V curves of the champion planar PSCs (MAPbI<sub>3</sub>) and planar BHJ-PSCs (MAPbI<sub>3</sub>) with 0.01 wt% Spiro-OMeTAD additive.

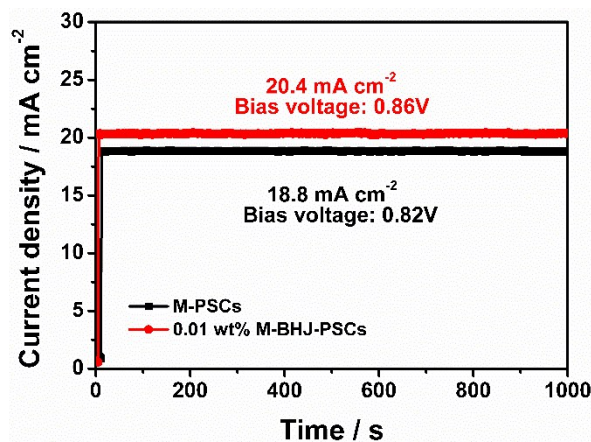

Fig. S6 Steady-state efficiencies measurements in planar PSCs (MAPbI<sub>3</sub>) and planar BHJ-PSCs (MAPbI<sub>3</sub>).

Table 3. Photovoltaic parameters based on planar BHJ-PSCs (MAPbI<sub>3</sub>) with different Spiro-OMeTAD additive.

| Spiro-OMeTAD additive |          | Voc [V]   | Jsc [mA cm <sup>-2</sup> ] | FF        | PCE [%]    |
|-----------------------|----------|-----------|----------------------------|-----------|------------|
| 0 wt%                 | Average  | 0.83±0.03 | 14.54±1.27                 | 0.68±0.05 | 8.21±0.59  |
|                       | Champion | 0.85      | 14.98                      | 0.71      | 8.99       |
| 0.01 wt%              | Average  | 0.87±0.04 | 16.68±1.19                 | 0.71±0.03 | 10.17±0.53 |
|                       | Champion | 0.91      | 16.28                      | 0.74      | 10.99      |
| 0.03 wt%              | Average  | 0.83±0.03 | 14.50±1.88                 | 0.69±0.04 | 8.39±0.51  |
|                       | Champion | 0.87      | 14.59                      | 0.70      | 8.82       |
| 0.05 wt%              | Average  | 0.83±0.03 | 10.59±2.08                 | 0.68±0.09 | 6.19±0.48  |
|                       | Champion | 0.84      | 12.02                      | 0.69      | 6.97       |
| 0.1 wt%               | Average  | 0.78±0.05 | 7.77±2.67                  | 0.67±0.06 | 4.22±0.48  |
|                       | Champion | 0.81      | 8.89                       | 0.69      | 4.97       |

Data in parentheses are the average values of the fabricated 30 PSCs.

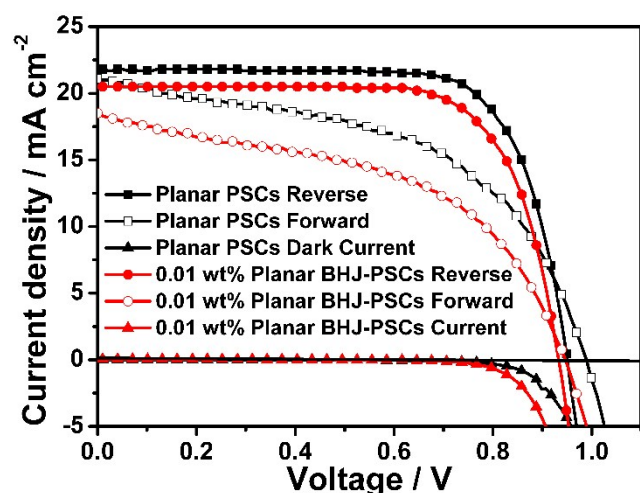

Fig. S7. J-V curves of the champion planar PSCs and planar BHJ-PSCs (MAPbI<sub>3-x</sub>Cl<sub>x</sub>) with 0.01 wt% Spiro-OMeTAD additive.

Table 4 Photovoltaic parameters based on planar BHJ-PSCs with different Spiro-OMeTAD additive.

| Spiro-OMeTAD additive |          | Voc [V]   | Jsc [mA cm <sup>-2</sup> ] | FF        | PCE [%]    |
|-----------------------|----------|-----------|----------------------------|-----------|------------|
| 0 wt%                 | Average  | 0.94±0.02 | 20.39±0.79                 | 0.73±0.01 | 13.97±0.78 |
|                       | Champion | 0.95      | 21.72                      | 0.74      | 15.32      |
| 0.01 wt%              | Average  | 0.91±0.02 | 18.28±0.89                 | 0.73±0.02 | 12.06±0.80 |
|                       | Champion | 0.93      | 20.54                      | 0.73      | 13.91      |
| 0.03 wt%              | Average  | 0.89±0.04 | 16.76±1.29                 | 0.73±0.01 | 10.85±1.16 |
|                       | Champion | 0.91      | 19.16                      | 0.74      | 12.95      |
| 0.05 wt%              | Average  | 0.87±0.03 | 15.38±0.91                 | 0.73±0.01 | 9.76±0.70  |
|                       | Champion | 0.93      | 16.89                      | 0.71      | 11.17      |
| 0.1 wt%               | Average  | 0.86±0.03 | 14.35±1.22                 | 0.73±0.02 | 8.90±0.68  |
|                       | Champion | 0.90      | 15.81                      | 0.72      | 10.22      |

Data in parentheses are the average values of the fabricated 50 PSCs.

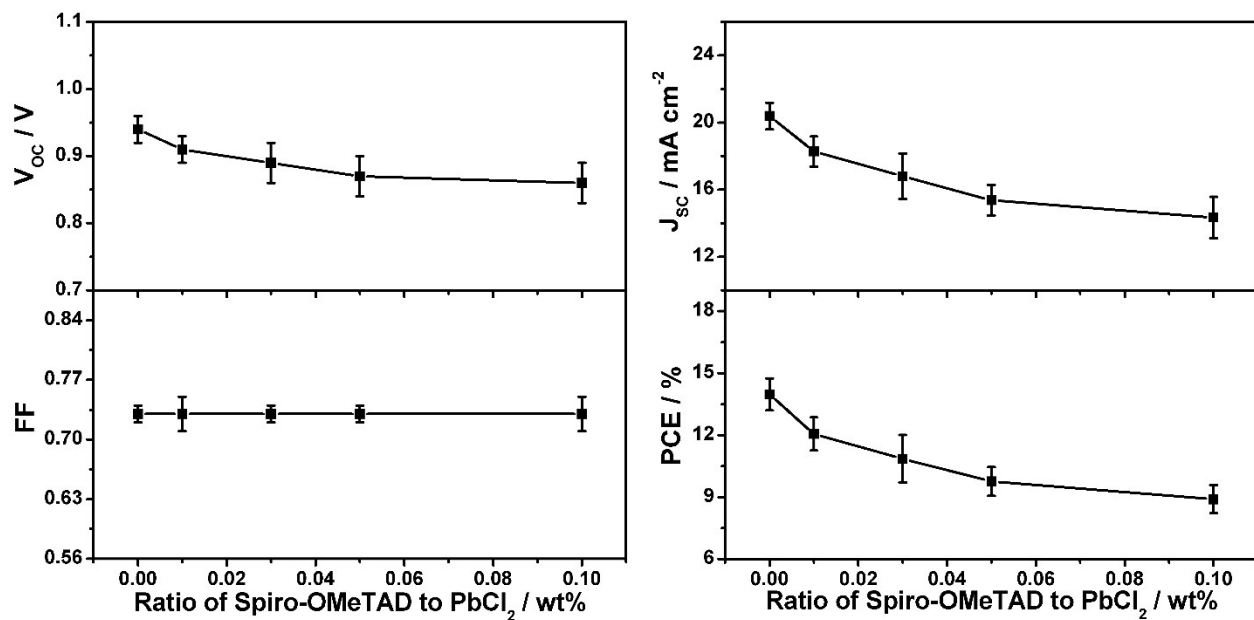

Fig. S7.  $J_{sc}$ ,  $V_{oc}$ , FF and PCE values versus different percentages by weight of Spiro-OMeTAD additive to mixed halide perovskite ( $\text{MAPbI}_{3-x}\text{Cl}_x$ ) in planar BHJ-PSCs.

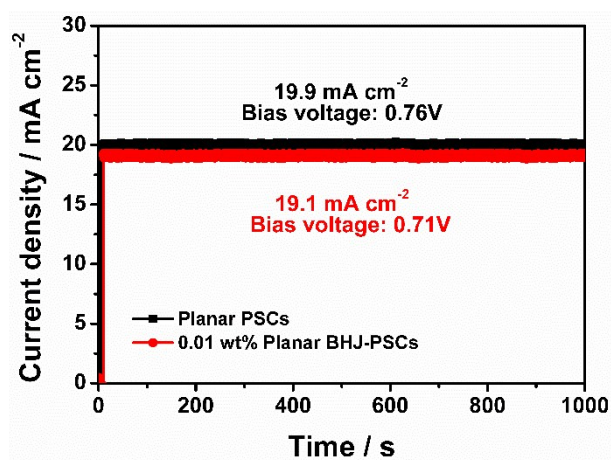

Fig. S8 Steady-state efficiencies measurements in planar PSCs ( $\text{MAPbI}_{3-x}\text{Cl}_x$ ) and planar BHJ-PSCs ( $\text{MAPbI}_{3-x}\text{Cl}_x$ ).

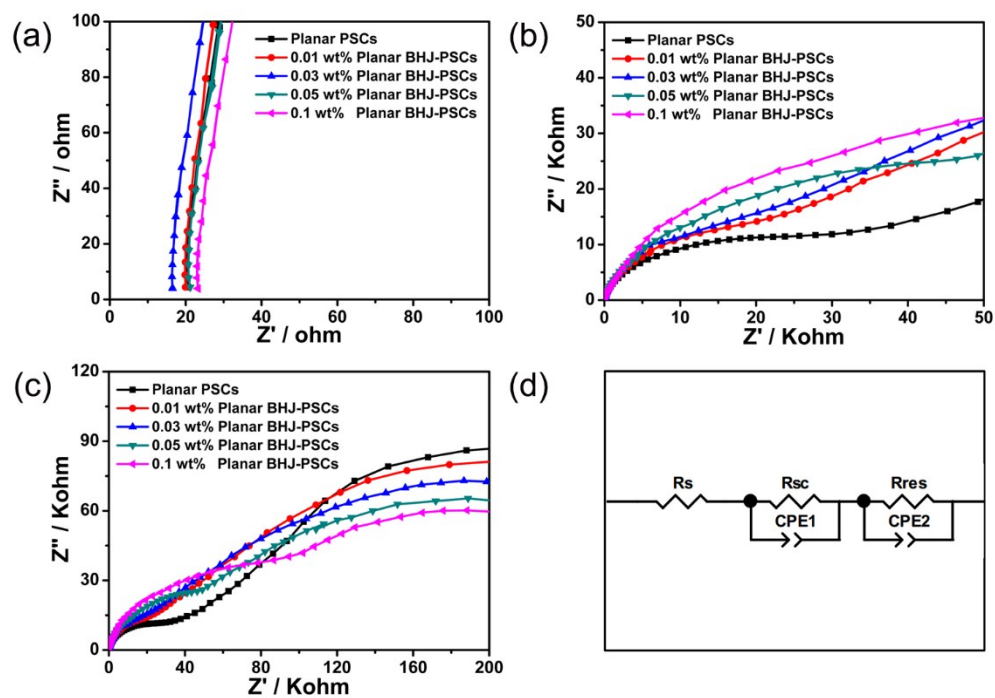

Fig. S9. (a-c) Sequence of Nyquist plot of PSCs based on planar BHJ-PSCs ( $\text{MAPbI}_{3-x}\text{Cl}_x$  light absorber) with different ratio of Spiro-OMeTAD additive in dark at 0.6 V, (d) was the equivalent circuit.
